# Supplementary material for: Application of Endoxylanases of Bacillus halodurans for Producing Xylooligosaccharides from Empty Fruit Bunch
Source: MDPI journal article supplement (doi:10.3390/catal13010039), 2022-12-25
Supplement: s1 [file s1]

**Table S1.** Cultivation of *Bifidobacteria* and *Lactobacillus* on MRS medium.

|                       | OD <sub>600</sub> |             |             |             | pH        |           |           |           |
|-----------------------|-------------------|-------------|-------------|-------------|-----------|-----------|-----------|-----------|
|                       | 0 hrs             | 24 hrs      | 48 hrs      | 72 hrs      | 0 hrs     | 24 hrs    | 48 hrs    | 72 hrs    |
| <i>B. animalis</i>    | 0.309±0.009       | 1.328±0.006 | 1.355±0.007 | 1.369±0.005 | 6.22±0.01 | 4.53±0.01 | 4.35±0.01 | 4.23±0.01 |
| <i>B. catenulatum</i> | 0.306±0.020       | 1.498±0.012 | 1.509±0.006 | 1.512±0.008 | 6.12±0.02 | 4.25±0.01 | 3.73±0.01 | 3.73±0.01 |
| <i>L. plantarum</i>   | 0.281±0.004       | 1.526±0.008 | 1.548±0.005 | 1.551±0.008 | 6.13±0.01 | 3.76±0.02 | 3.73±0.01 | 3.73±0.02 |
| <i>L. acidophilus</i> | 0.260±0.004       | 1.391±0.036 | 1.401±0.003 | 1.402±0.003 | 6.15±0.01 | 3.90±0.00 | 3.82±0.01 | 3.79±0.01 |

**Table S2.** Cultivation of *Bifidobacteria* and *Lactobacillus* on MRS medium containing 2% (w/v) glucose.

|                       | OD <sub>600</sub> |             |             |             | pH        |           |           |           |
|-----------------------|-------------------|-------------|-------------|-------------|-----------|-----------|-----------|-----------|
|                       | 0 hrs             | 24 hrs      | 48 hrs      | 72 hrs      | 0 hrs     | 24 hrs    | 48 hrs    | 72 hrs    |
| <i>B. animalis</i>    | 0.310±0.017       | 1.339±0.011 | 1.348±0.013 | 1.407±0.006 | 6.20±0.01 | 4.35±0.01 | 4.22±0.01 | 4.13±0.01 |
| <i>B. catenulatum</i> | 0.275±0.007       | 1.393±0.004 | 1.455±0.006 | 1.496±0.002 | 6.04±0.01 | 3.66±0.03 | 3.52±0.01 | 3.43±0.01 |
| <i>L. plantarum</i>   | 0.270±0.003       | 1.416±0.005 | 1.497±0.005 | 1.543±0.002 | 6.07±0.01 | 3.53±0.01 | 3.50±0.00 | 3.41±0.01 |
| <i>L. acidophilus</i> | 0.262±0.002       | 1.303±0.001 | 1.423±0.010 | 1.430±0.015 | 6.08±0.00 | 3.90±0.03 | 3.77±0.01 | 3.49±0.00 |

**Table S3.** Cultivation of *Bifidobacteria* and *Lactobacillus* on MRS medium containing 2% (w/v) XOS from EFB.

|                       | OD <sub>600</sub> |             |             |             | pH        |           |           |           |
|-----------------------|-------------------|-------------|-------------|-------------|-----------|-----------|-----------|-----------|
|                       | 0 hrs             | 24 hrs      | 48 hrs      | 72 hrs      | 0 hrs     | 24 hrs    | 48 hrs    | 72 hrs    |
| <i>B. animalis</i>    | 0.405±0.008       | 1.459±0.005 | 1.487±0.006 | 1.510±0.003 | 7.10±0.00 | 4.51±0.01 | 4.38±0.00 | 4.31±0.01 |
| <i>B. catenulatum</i> | 0.409±0.006       | 1.506±0.009 | 1.580±0.008 | 1.632±0.009 | 7.05±0.00 | 4.24±0.01 | 4.20±0.00 | 4.18±0.00 |
| <i>L. plantarum</i>   | 0.415±0.007       | 1.558±0.006 | 1.623±0.008 | 1.691±0.007 | 7.07±0.01 | 4.17±0.01 | 4.08±0.01 | 4.02±0.01 |
| <i>L. acidophilus</i> | 0.426±0.005       | 1.497±0.006 | 1.558±0.008 | 1.617±0.010 | 7.09±0.01 | 4.47±0.01 | 4.32±0.01 | 4.22±0.01 |
